# Supplementary material
Source: Springer Nature journal article supplement (https://www.springermedizin.de/resource/supplementary/12913_2013_2950_MOESM7_ESM.pdf/9532010)

5mmHg or greater

reduction in blood

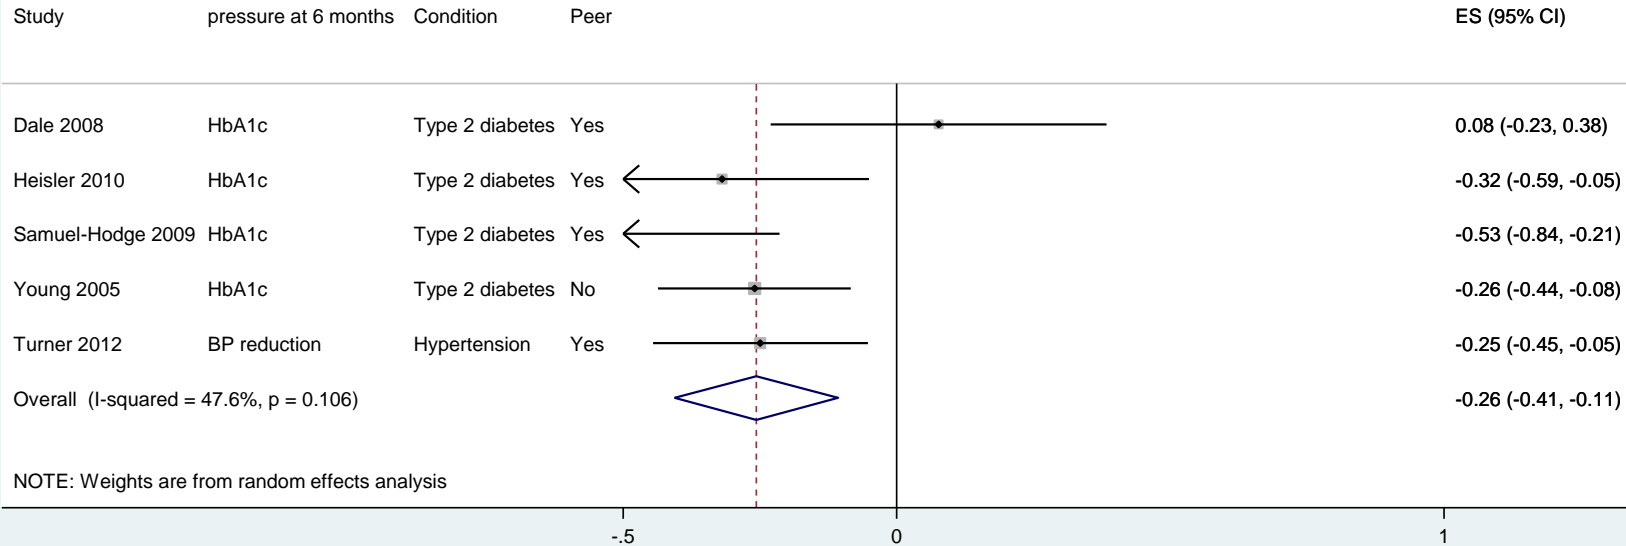

Supplement: MOESM7 [file 9532010]
